# Supplementary material for: Hydrothermal synthesis, crystal structure and properties of Ni(ii)–4f complexes based on 1H-benzimidazole-5,6-dicarboxylic acid
Source: Royal Society of Chemistry journal article supplement (doi:10.1039/c2dt30277b), 2012-01-01
Supplement: c2dt30277b.pdf [file c2dt30277b.pdf]

# Hydrothermal synthesis, crystal structure and properties of Ni(II)-4f complexes based on 1*H*-benzimidazole-5,6- dicarboxylic acid

Ya-Guang Sun, Gang Xiong, Mei-Yan Guo, Fu Ding, Shu-Ju Wang, Philippe F. Smet,  
Dirk Poelman, En-Jun Gao, Francis Verpoort

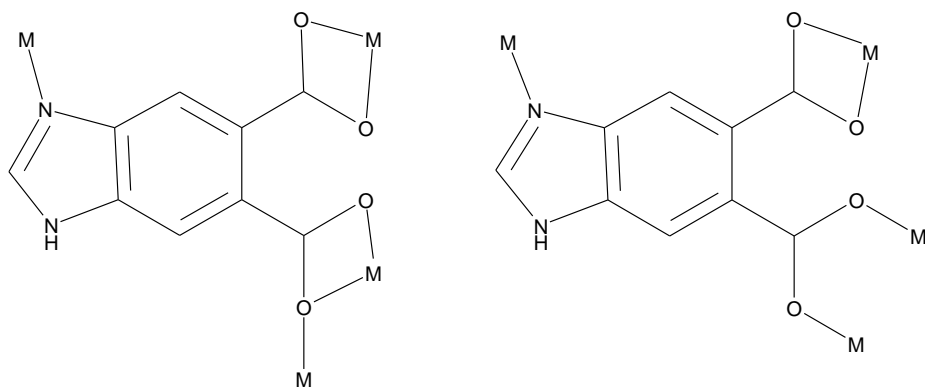

Model 1: (κ<sup>1</sup>-κ<sup>1</sup>-μ<sup>1</sup>)-(κ<sup>1</sup>-κ<sup>2</sup>-μ<sup>2</sup>)-κ<sup>1</sup>-μ<sup>4</sup>

Model 2: (κ<sup>1</sup>-κ<sup>1</sup>-μ<sup>1</sup>)-(κ<sup>1</sup>-κ<sup>1</sup>-μ<sup>2</sup>)-κ<sup>1</sup>-μ<sup>4</sup>

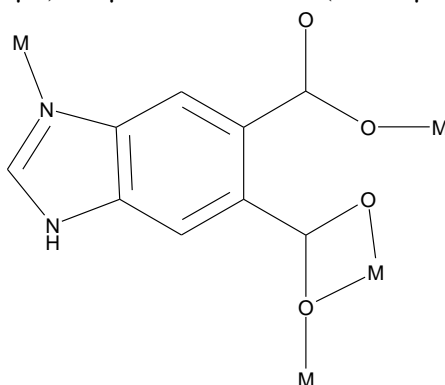

Model 3: (κ<sup>1</sup>-μ<sup>1</sup>)-(κ<sup>1</sup>-κ<sup>2</sup>-μ<sup>2</sup>)-κ<sup>1</sup>-μ<sup>4</sup>

**Scheme 1.** Schematic representation of the observed coordination modes of Hbidc<sup>2-</sup> in complex **1**, **8** and **9**.

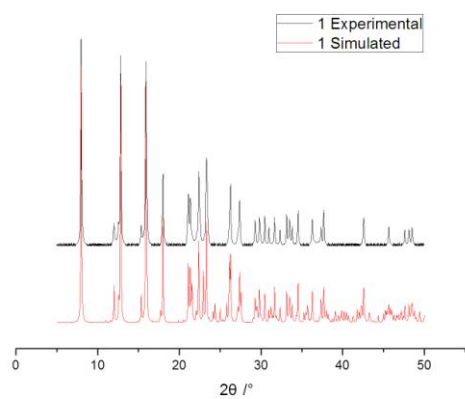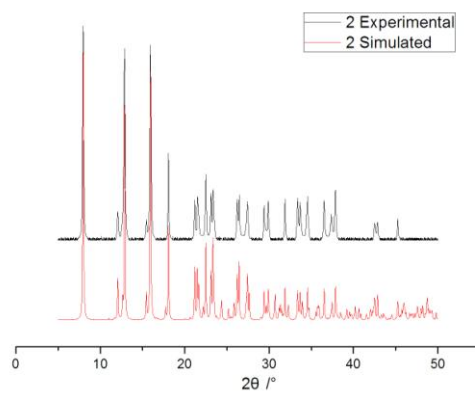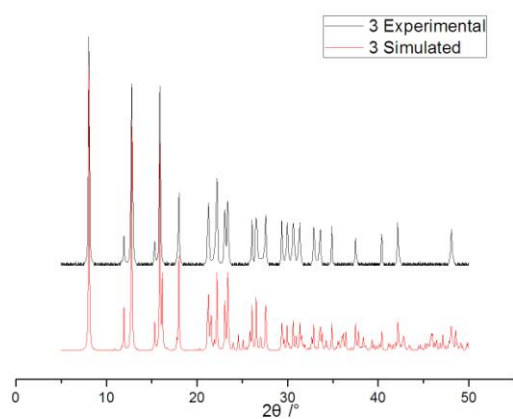

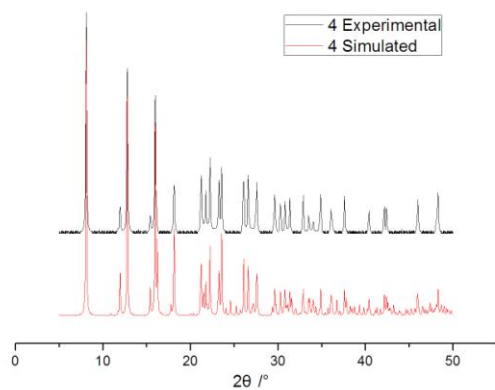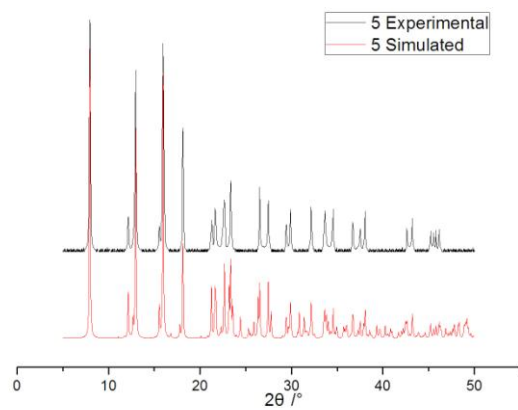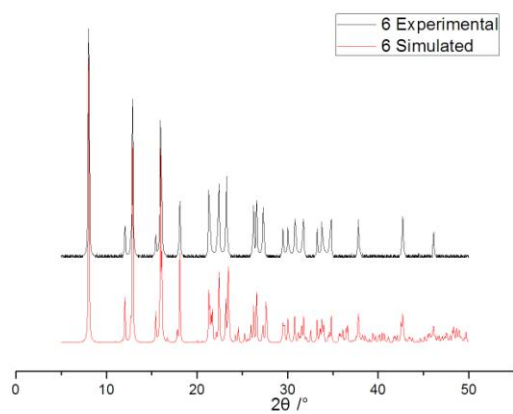

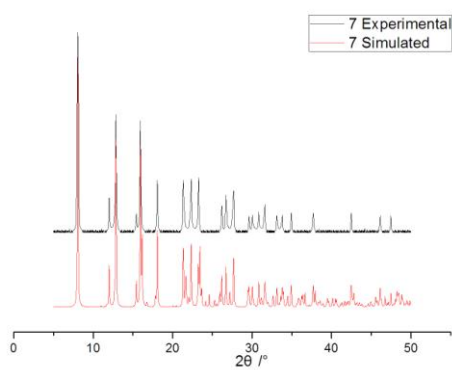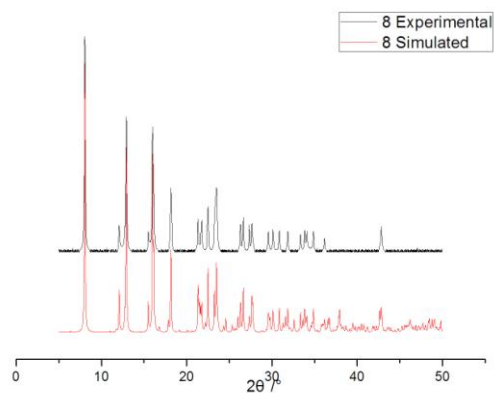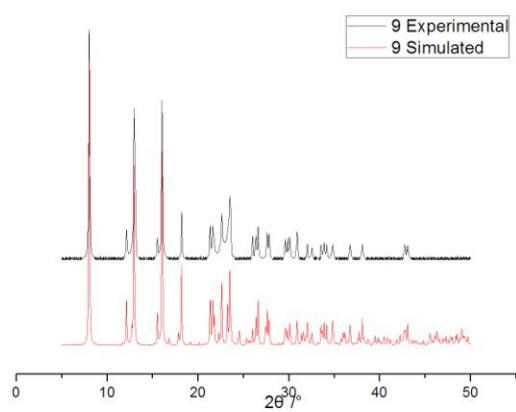

Fig. S1 The simulated and experimental PXR D patterns of **1-9**

Table S1. Selected Bond Lengths (Å) and Angle (°) for Compounds **1-9**

| 1                   |           |                      |             |
|---------------------|-----------|----------------------|-------------|
| O(5)-Pr(1)#1        | 2.515(7)  | Pr(1)-O(3)#2         | 2.390(8)    |
| O(4)-Pr(1)#1        | 2.665(7)  | Pr(1)-O(7)#2         | 2.433(7)    |
| C(9)-Pr(1)#1        | 2.979(11) | Pr(1)-O(13)          | 2.453(7)    |
| O(7)-Pr(1)#2        | 2.433(7)  | Pr(1)-O(5)#3         | 2.515(7)    |
| N(1)-Ni(2)          | 2.083(10) | Pr(1)-O(4)#3         | 2.665(7)    |
| O(12)-Pr(1)         | 2.551(8)  | Pr(1)-C(9)#3         | 2.979(11)   |
| O(9)-Ni(2)          | 2.074(14) | Pr(1)-Pr(1)#2        | 4.1112(14)  |
| O(1)-Pr(1)          | 2.443(7)  | Ni(2)-O(10)#4        | 2.054(9)    |
| O(3)-Pr(1)#2        | 2.390(8)  | Ni(2)-O(10)          | 2.054(9)    |
| O(3)-Pr(1)          | 2.830(7)  | Ni(2)-O(11)          | 2.059(13)   |
| O(2)-Pr(1)          | 2.467(7)  | Ni(2)-N(1)#4         | 2.083(10)   |
| Pr(1)#2-O(3)-Pr(1)  | 103.6(3)  | O(2)-Pr(1)-O(4)#3    | 125.6(2)    |
| O(3)#2-Pr(1)-O(7)#2 | 81.2(2)   | O(5)#3-Pr(1)-O(4)#3  | 49.9(2)     |
| O(3)#2-Pr(1)-O(1)   | 79.3(3)   | O(12)-Pr(1)-O(4)#3   | 103.3(2)    |
| O(7)#2-Pr(1)-O(1)   | 132.2(3)  | O(3)#2-Pr(1)-O(3)    | 76.4(3)     |
| O(3)#2-Pr(1)-O(13)  | 81.1(3)   | O(7)#2-Pr(1)-O(3)    | 65.3(2)     |
| O(7)#2-Pr(1)-O(13)  | 78.0(3)   | O(1)-Pr(1)-O(3)      | 67.9(2)     |
| O(1)-Pr(1)-O(13)    | 139.7(3)  | O(13)-Pr(1)-O(3)     | 139.2(2)    |
| O(3)#2-Pr(1)-O(2)   | 124.9(3)  | O(2)-Pr(1)-O(3)      | 48.8(2)     |
| O(7)#2-Pr(1)-O(2)   | 80.9(3)   | O(5)#3-Pr(1)-O(3)    | 121.2(2)    |
| O(1)-Pr(1)-O(2)     | 75.7(3)   | O(12)-Pr(1)-O(3)     | 109.9(2)    |
| O(13)-Pr(1)-O(2)    | 143.1(3)  | O(4)#3-Pr(1)-O(3)    | 137.6(2)    |
| O(3)#2-Pr(1)-O(5)#3 | 136.0(2)  | O(10)#4-Ni(2)-O(10)  | 174.7(5)    |
| O(7)#2-Pr(1)-O(5)#3 | 142.3(3)  | O(10)#4-Ni(2)-O(11)  | 87.3(3)     |
| O(1)-Pr(1)-O(5)#3   | 73.0(3)   | O(10)-Ni(2)-O(11)    | 87.3(3)     |
| O(13)-Pr(1)-O(5)#3  | 98.6(3)   | O(10)#4-Ni(2)-O(9)   | 92.7(3)     |
| O(2)-Pr(1)-O(5)#3   | 80.4(3)   | O(10)-Ni(2)-O(9)     | 92.7(3)     |
| O(3)#2-Pr(1)-O(12)  | 148.6(2)  | O(11)-Ni(2)-O(9)     | 180.000(10) |
| O(7)#2-Pr(1)-O(12)  | 74.6(2)   | O(10)#4-Ni(2)-N(1)#4 | 93.0(3)     |
| O(1)-Pr(1)-O(12)    | 132.0(3)  | O(10)-Ni(2)-N(1)#4   | 86.9(3)     |
| O(13)-Pr(1)-O(12)   | 74.7(3)   | O(11)-Ni(2)-N(1)#4   | 89.2(3)     |
| O(2)-Pr(1)-O(12)    | 70.7(3)   | O(9)-Ni(2)-N(1)#4    | 90.8(3)     |
| O(5)#3-Pr(1)-O(12)  | 68.4(2)   | O(10)#4-Ni(2)-N(1)   | 86.9(3)     |
| O(3)#2-Pr(1)-O(4)#3 | 88.9(2)   | O(10)-Ni(2)-N(1)     | 93.0(3)     |
| O(7)#2-Pr(1)-O(4)#3 | 151.8(3)  | O(11)-Ni(2)-N(1)     | 89.2(3)     |
| O(1)-Pr(1)-O(4)#3   | 70.3(3)   | O(9)-Ni(2)-N(1)      | 90.8(3)     |
| O(13)-Pr(1)-O(4)#3  | 74.4(2)   | N(1)#4-Ni(2)-N(1)    | 178.5(6)    |
| 2                   |           |                      |             |
| O(7)-Sm(1)#1        | 2.394(5)  | Sm(1)-O(13)          | 2.510(5)    |
| O(12)-Sm(1)         | 2.397(5)  | Sm(1)-O(1)#3         | 2.636(6)    |
| O(9)-Ni(2)          | 2.059(6)  | Sm(1)-O(4)           | 2.839(5)    |

|                     |            |                     |            |
|---------------------|------------|---------------------|------------|
| O(1)-Sm(1)#2        | 2.636(6)   | Sm(1)-Sm(1)#1       | 4.0760(12) |
| O(2)-Sm(1)#2        | 2.472(5)   | Ni(2)-O(11)         | 2.058(8)   |
| Sm(1)-O(4)#1        | 2.336(5)   | Ni(2)-O(9)#4        | 2.059(6)   |
| Sm(1)-O(5)          | 2.387(5)   | Ni(2)-N(1)#4        | 2.070(7)   |
| Sm(1)-O(7)#1        | 2.394(5)   | Ni(2)-N(1)          | 2.070(7)   |
| Sm(1)-O(3)          | 2.417(5)   | Ni(2)-O(10)         | 2.080(9)   |
| Sm(1)-O(2)#3        | 2.472(5)   | O(4)-Sm(1)#1        | 2.336(5)   |
| S(1)-O(7)-Sm(1)#1   | 141.2(3)   | O(13)-Sm(1)-O(1)#3  | 103.96(18) |
| O(4)#1-Sm(1)-O(5)   | 81.40(17)  | O(4)#1-Sm(1)-O(4)   | 76.50(17)  |
| O(4)#1-Sm(1)-O(7)#1 | 79.80(18)  | O(5)-Sm(1)-O(4)     | 65.01(16)  |
| O(5)-Sm(1)-O(7)#1   | 131.73(18) | O(7)#1-Sm(1)-O(4)   | 67.49(17)  |
| O(4)#1-Sm(1)-O(12)  | 80.73(18)  | O(12)-Sm(1)-O(4)    | 139.33(19) |
| O(5)-Sm(1)-O(12)    | 78.67(19)  | O(3)-Sm(1)-O(4)     | 48.96(16)  |
| O(7)#1-Sm(1)-O(12)  | 139.96(19) | O(2)#3-Sm(1)-O(4)   | 121.57(15) |
| O(4)#1-Sm(1)-O(3)   | 125.22(17) | O(13)-Sm(1)-O(4)    | 110.67(17) |
| O(5)-Sm(1)-O(3)     | 80.06(17)  | O(1)#3-Sm(1)-O(4)   | 137.10(15) |
| O(7)#1-Sm(1)-O(3)   | 75.52(19)  | O(11)-Ni(2)-O(9)    | 87.27(16)  |
| O(12)-Sm(1)-O(3)    | 143.04(18) | O(11)-Ni(2)-O(9)#4  | 87.27(16)  |
| O(4)#1-Sm(1)-O(2)#3 | 135.86(18) | O(9)-Ni(2)-O(9)#4   | 174.5(3)   |
| O(5)-Sm(1)-O(2)#3   | 142.12(17) | O(11)-Ni(2)-N(1)#4  | 89.39(18)  |
| O(7)#1-Sm(1)-O(2)#3 | 73.20(18)  | O(9)-Ni(2)-N(1)#4   | 87.1(2)    |
| O(12)-Sm(1)-O(2)#3  | 98.18(19)  | O(9)#4-Ni(2)-N(1)#4 | 92.9(2)    |
| O(3)-Sm(1)-O(2)#3   | 80.86(17)  | O(11)-Ni(2)-N(1)    | 89.39(18)  |
| O(4)#1-Sm(1)-O(13)  | 147.59(18) | O(9)-Ni(2)-N(1)     | 92.9(2)    |
| O(5)-Sm(1)-O(13)    | 74.17(18)  | O(9)#4-Ni(2)-N(1)   | 87.1(2)    |
| O(7)#1-Sm(1)-O(13)  | 132.54(19) | N(1)#4-Ni(2)-N(1)   | 178.8(4)   |
| O(12)-Sm(1)-O(13)   | 73.91(19)  | O(11)-Ni(2)-O(10)   | 180.000(1) |
| O(3)-Sm(1)-O(13)    | 71.37(18)  | O(9)-Ni(2)-O(10)    | 92.73(16)  |
| O(2)#3-Sm(1)-O(13)  | 68.81(18)  | O(9)#4-Ni(2)-O(10)  | 92.73(16)  |
| O(4)#1-Sm(1)-O(1)#3 | 87.73(17)  | N(1)#4-Ni(2)-O(10)  | 90.61(18)  |
| O(5)-Sm(1)-O(1)#3   | 151.89(17) | N(1)-Ni(2)-O(10)    | 90.61(18)  |
| O(7)#1-Sm(1)-O(1)#3 | 70.58(17)  | S(1)-O(5)-Sm(1)     | 137.8(3)   |
| O(12)-Sm(1)-O(1)#3  | 74.02(19)  | Sm(1)#1-O(4)-Sm(1)  | 103.50(17) |
| O(3)-Sm(1)-O(1)#3   | 126.65(17) | O(2)#3-Sm(1)-O(1)#3 | 50.71(16)  |
| 3                   |            |                     |            |
| Eu(1)-O(1)          | 2.304(2)   | Eu(2)-O(24)         | 2.430(2)   |
| Eu(1)-O(13)         | 2.382(2)   | Eu(2)-O(23)         | 2.456(2)   |
| Eu(1)-O(8)          | 2.426(2)   | Eu(2)-O(4)#1        | 2.457(2)   |
| Eu(1)-O(22)         | 2.426(2)   | Eu(2)-O(3)#1        | 2.498(2)   |
| Eu(1)-O(9)          | 2.429(2)   | Eu(2)-O(1)          | 2.857(2)   |
| Eu(1)-O(5)          | 2.453(2)   | Ni(3)-O(19)         | 2.022(3)   |
| Eu(1)-O(21)         | 2.478(2)   | Ni(3)-O(17)         | 2.061(3)   |
| Eu(1)-O(6)          | 2.641(2)   | Ni(3)-O(18)         | 2.070(3)   |

|                   |           |                     |            |
|-------------------|-----------|---------------------|------------|
| Eu(1)-O(7)        | 2.661(3)  | Ni(3)-N(3)#2        | 2.072(3)   |
| Eu(2)-O(14)       | 2.358(2)  | Ni(3)-N(1)          | 2.074(3)   |
| Eu(2)-O(6)        | 2.371(3)  | Ni(3)-O(20)         | 2.096(3)   |
| Eu(2)-O(2)        | 2.391(2)  | O(3)-Eu(2)#3        | 2.498(2)   |
| Eu(2)-O(10)       | 2.401(2)  | O(4)-Eu(2)#3        | 2.457(2)   |
| O(1)-Eu(1)-O(13)  | 78.44(9)  | O(2)-Eu(2)-O(24)    | 81.45(8)   |
| O(1)-Eu(1)-O(8)   | 136.37(9) | O(10)-Eu(2)-O(24)   | 77.34(8)   |
| O(13)-Eu(1)-O(8)  | 139.71(8) | O(14)-Eu(2)-O(23)   | 133.49(9)  |
| O(1)-Eu(1)-O(22)  | 79.99(8)  | O(6)-Eu(2)-O(23)    | 75.25(8)   |
| O(13)-Eu(1)-O(22) | 76.70(9)  | O(2)-Eu(2)-O(23)    | 146.49(9)  |
| O(8)-Eu(1)-O(22)  | 88.92(8)  | O(10)-Eu(2)-O(23)   | 71.89(8)   |
| O(1)-Eu(1)-O(9)   | 84.11(8)  | O(24)-Eu(2)-O(23)   | 73.75(9)   |
| O(13)-Eu(1)-O(9)  | 137.53(8) | O(14)-Eu(2)-O(4)#1  | 74.26(8)   |
| O(8)-Eu(1)-O(9)   | 76.20(8)  | O(6)-Eu(2)-O(4)#1   | 95.53(8)   |
| O(22)-Eu(1)-O(9)  | 137.65(9) | O(2)-Eu(2)-O(4)#1   | 125.73(8)  |
| O(1)-Eu(1)-O(5)   | 128.66(8) | O(10)-Eu(2)-O(4)#1  | 148.29(8)  |
| O(13)-Eu(1)-O(5)  | 86.89(8)  | O(24)-Eu(2)-O(4)#1  | 89.32(8)   |
| O(8)-Eu(1)-O(5)   | 82.88(8)  | O(23)-Eu(2)-O(4)#1  | 76.81(8)   |
| O(22)-Eu(1)-O(5)  | 143.53(9) | O(14)-Eu(2)-O(3)#1  | 72.59(8)   |
| O(9)-Eu(1)-O(5)   | 74.42(9)  | O(6)-Eu(2)-O(3)#1   | 137.83(9)  |
| O(1)-Eu(1)-O(21)  | 139.21(8) | O(2)-Eu(2)-O(3)#1   | 74.46(8)   |
| O(13)-Eu(1)-O(21) | 68.56(8)  | O(10)-Eu(2)-O(3)#1  | 140.46(8)  |
| O(8)-Eu(1)-O(21)  | 71.16(8)  | O(24)-Eu(2)-O(3)#1  | 68.78(8)   |
| O(22)-Eu(1)-O(21) | 69.83(8)  | O(23)-Eu(2)-O(3)#1  | 115.31(8)  |
| O(9)-Eu(1)-O(21)  | 136.62(8) | O(4)#1-Eu(2)-O(3)#1 | 52.66(8)   |
| O(5)-Eu(1)-O(21)  | 73.89(8)  | O(14)-Eu(2)-O(1)    | 71.64(8)   |
| O(1)-Eu(1)-O(6)   | 77.90(8)  | O(6)-Eu(2)-O(1)     | 72.60(8)   |
| O(13)-Eu(1)-O(6)  | 70.43(8)  | O(2)-Eu(2)-O(1)     | 48.76(8)   |
| O(8)-Eu(1)-O(6)   | 126.96(7) | O(10)-Eu(2)-O(1)    | 63.28(7)   |
| O(22)-Eu(1)-O(6)  | 143.30(8) | O(24)-Eu(2)-O(1)    | 118.45(8)  |
| O(9)-Eu(1)-O(6)   | 68.17(8)  | O(23)-Eu(2)-O(1)    | 127.53(8)  |
| O(5)-Eu(1)-O(6)   | 50.92(8)  | O(4)#1-Eu(2)-O(1)   | 145.86(8)  |
| O(21)-Eu(1)-O(6)  | 111.05(8) | O(3)#1-Eu(2)-O(1)   | 116.46(7)  |
| O(1)-Eu(1)-O(7)   | 85.46(8)  | C(23)#1-Eu(2)-O(1)  | 135.10(8)  |
| O(13)-Eu(1)-O(7)  | 146.25(8) | O(19)-Ni(3)-O(17)   | 173.72(11) |
| O(8)-Eu(1)-O(7)   | 51.17(8)  | O(19)-Ni(3)-O(18)   | 85.88(10)  |
| O(22)-Eu(1)-O(7)  | 71.36(8)  | O(17)-Ni(3)-O(18)   | 87.84(10)  |
| O(9)-Eu(1)-O(7)   | 68.44(8)  | O(19)-Ni(3)-N(3)#2  | 87.42(11)  |
| O(5)-Eu(1)-O(7)   | 125.74(8) | O(17)-Ni(3)-N(3)#2  | 92.48(11)  |
| O(21)-Eu(1)-O(7)  | 109.00(8) | O(18)-Ni(3)-N(3)#2  | 86.51(10)  |
| O(6)-Eu(1)-O(7)   | 134.72(8) | O(19)-Ni(3)-N(1)    | 92.02(11)  |
| O(14)-Eu(2)-O(6)  | 72.23(8)  | O(17)-Ni(3)-N(1)    | 87.93(11)  |
| O(14)-Eu(2)-O(2)  | 79.68(9)  | O(18)-Ni(3)-N(1)    | 92.04(10)  |

|                      |            |                      |            |
|----------------------|------------|----------------------|------------|
| O(6)-Eu(2)-O(2)      | 120.45(8)  | N(3)#2-Ni(3)-N(1)    | 178.47(13) |
| O(14)-Eu(2)-O(10)    | 132.81(8)  | O(19)-Ni(3)-O(20)    | 96.71(10)  |
| O(6)-Eu(2)-O(10)     | 81.48(9)   | O(17)-Ni(3)-O(20)    | 89.57(10)  |
| O(2)-Eu(2)-O(10)     | 81.05(8)   | O(18)-Ni(3)-O(20)    | 175.44(9)  |
| O(14)-Eu(2)-O(24)    | 140.27(8)  | N(3)#2-Ni(3)-O(20)   | 89.85(10)  |
| O(6)-Eu(2)-O(24)     | 146.59(8)  | N(1)-Ni(3)-O(20)     | 91.62(10)  |
| 4                    |            |                      |            |
| O(13)-Gd(1)          | 2.403(4)   | Gd(1)-O(2)           | 2.548(3)   |
| O(4)-Gd(1)#1         | 2.400(3)   | Gd(1)-O(3)#5         | 2.765(3)   |
| O(3)-Gd(1)#2         | 2.316(3)   | N(1)-Ni(1)           | 2.066(3)   |
| O(3)-Gd(1)#1         | 2.765(3)   | O(7)-Gd(1)#4         | 2.361(3)   |
| Gd(1)-O(3)#3         | 2.316(3)   | Ni(1)-O(10)#6        | 2.044(3)   |
| Gd(1)-O(7)#4         | 2.361(3)   | Ni(1)-O(10)          | 2.044(3)   |
| Gd(1)-O(5)           | 2.366(3)   | Ni(1)-O(9)           | 2.058(4)   |
| Gd(1)-O(4)#5         | 2.400(3)   | Ni(1)-N(1)#6         | 2.066(3)   |
| Gd(1)-O(12)          | 2.441(3)   | Ni(1)-O(11)          | 2.084(5)   |
| Gd(1)-O(1)           | 2.452(3)   |                      |            |
| Gd(1)#2-O(3)-Gd(1)#1 | 104.90(10) | O(13)-Gd(1)-O(2)     | 72.28(14)  |
| O(3)#3-Gd(1)-O(7)#4  | 78.26(13)  | O(12)-Gd(1)-O(2)     | 99.59(11)  |
| O(3)#3-Gd(1)-O(5)    | 80.42(10)  | O(1)-Gd(1)-O(2)      | 51.14(10)  |
| O(7)#4-Gd(1)-O(5)    | 134.49(13) | O(3)#3-Gd(1)-O(3)#5  | 75.10(10)  |
| O(3)#3-Gd(1)-O(4)#5  | 124.59(11) | O(7)#4-Gd(1)-O(3)#5  | 69.26(11)  |
| O(7)#4-Gd(1)-O(4)#5  | 76.95(15)  | O(5)-Gd(1)-O(3)#5    | 66.58(12)  |
| O(5)-Gd(1)-O(4)#5    | 83.04(12)  | O(4)#5-Gd(1)-O(3)#5  | 49.86(10)  |
| O(3)#3-Gd(1)-O(13)   | 79.00(16)  | O(13)-Gd(1)-O(3)#5   | 137.43(16) |
| O(7)#4-Gd(1)-O(13)   | 136.53(14) | O(12)-Gd(1)-O(3)#5   | 114.75(10) |
| O(5)-Gd(1)-O(13)     | 76.28(16)  | O(1)-Gd(1)-O(3)#5    | 121.57(11) |
| O(4)#5-Gd(1)-O(13)   | 145.50(14) | O(2)-Gd(1)-O(3)#5    | 139.67(11) |
| O(3)#3-Gd(1)-O(12)   | 143.75(11) | O(10)#6-Ni(1)-O(10)  | 174.00(18) |
| O(7)#4-Gd(1)-O(12)   | 137.92(12) | O(10)#6-Ni(1)-O(9)   | 87.00(9)   |
| O(5)-Gd(1)-O(12)     | 73.24(11)  | O(10)-Ni(1)-O(9)     | 87.00(9)   |
| O(4)#5-Gd(1)-O(12)   | 76.82(12)  | O(10)#6-Ni(1)-N(1)   | 92.42(12)  |
| O(13)-Gd(1)-O(12)    | 70.96(14)  | O(10)-Ni(1)-N(1)     | 87.51(12)  |
| O(3)#3-Gd(1)-O(1)    | 137.49(10) | O(9)-Ni(1)-N(1)      | 89.31(9)   |
| O(7)#4-Gd(1)-O(1)    | 73.69(12)  | O(10)#6-Ni(1)-N(1)#6 | 87.51(12)  |
| O(5)-Gd(1)-O(1)      | 141.34(11) | O(10)-Ni(1)-N(1)#6   | 92.42(12)  |
| O(4)#5-Gd(1)-O(1)    | 79.08(11)  | O(9)-Ni(1)-N(1)#6    | 89.31(9)   |
| O(13)-Gd(1)-O(1)     | 100.32(17) | N(1)-Ni(1)-N(1)#6    | 178.63(19) |
| O(12)-Gd(1)-O(1)     | 69.45(11)  | O(10)#6-Ni(1)-O(11)  | 93.00(9)   |
| O(3)#3-Gd(1)-O(2)    | 89.86(10)  | O(10)-Ni(1)-O(11)    | 93.00(9)   |
| O(7)#4-Gd(1)-O(2)    | 71.13(12)  | O(9)-Ni(1)-O(11)     | 180.000(1) |
| O(5)-Gd(1)-O(2)      | 148.33(14) | N(1)-Ni(1)-O(11)     | 90.69(9)   |
| O(4)#5-Gd(1)-O(2)    | 126.19(10) | N(1)#6-Ni(1)-O(11)   | 90.69(9)   |



| 5                    |           |                     |            |
|----------------------|-----------|---------------------|------------|
| O(3)-Tb(1)#1         | 2.290(8)  | Tb(1)-O(12)         | 2.473(8)   |
| O(3)-Tb(1)#2         | 2.885(8)  | Tb(1)-O(2)          | 2.628(9)   |
| O(4)-Tb(1)#2         | 2.372(8)  | Tb(1)-O(3)#5        | 2.885(8)   |
| Tb(1)-O(3)#3         | 2.290(8)  | Ni(2)-O(10)         | 2.060(15)  |
| Tb(1)-O(13)          | 2.344(8)  | Ni(2)-O(9)#6        | 2.060(10)  |
| Tb(1)-O(5)           | 2.346(8)  | Ni(2)-O(9)          | 2.060(10)  |
| Tb(1)-O(7)#4         | 2.355(8)  | Ni(2)-N(1)          | 2.068(11)  |
| Tb(1)-O(4)#5         | 2.372(8)  | Ni(2)-N(1)#6        | 2.068(11)  |
| Tb(1)-O(1)           | 2.428(9)  | Ni(2)-O(11)         | 2.073(15)  |
| O(7)-Tb(1)#4         | 2.355(8)  |                     |            |
| Tb(1)#1-O(3)-Tb(1)#2 | 103.4(3)  | O(4)#5-Tb(1)-O(2)   | 127.5(3)   |
| O(3)#3-Tb(1)-O(13)   | 81.0(3)   | O(1)-Tb(1)-O(2)     | 51.0(3)    |
| O(3)#3-Tb(1)-O(5)    | 81.3(3)   | O(12)-Tb(1)-O(2)    | 104.7(3)   |
| O(13)-Tb(1)-O(5)     | 79.8(3)   | O(3)#3-Tb(1)-O(3)#5 | 76.6(3)    |
| O(3)#3-Tb(1)-O(7)#4  | 80.5(3)   | O(13)-Tb(1)-O(3)#5  | 140.0(3)   |
| O(13)-Tb(1)-O(7)#4   | 140.6(3)  | O(5)-Tb(1)-O(3)#5   | 64.5(3)    |
| O(5)-Tb(1)-O(7)#4    | 130.7(3)  | O(7)#4-Tb(1)-O(3)#5 | 66.8(3)    |
| O(3)#3-Tb(1)-O(4)#5  | 125.0(3)  | O(4)#5-Tb(1)-O(3)#5 | 48.6(3)    |
| O(13)-Tb(1)-O(4)#5   | 142.8(3)  | O(1)-Tb(1)-O(3)#5   | 121.8(3)   |
| O(5)-Tb(1)-O(4)#5    | 78.9(3)   | O(12)-Tb(1)-O(3)#5  | 111.0(3)   |
| O(7)#4-Tb(1)-O(4)#5  | 75.0(3)   | O(2)-Tb(1)-O(3)#5   | 136.2(3)   |
| O(3)#3-Tb(1)-O(1)    | 135.7(3)  | O(10)-Ni(2)-O(9)#6  | 87.4(3)    |
| O(13)-Tb(1)-O(1)     | 97.4(3)   | O(10)-Ni(2)-O(9)    | 87.4(3)    |
| O(5)-Tb(1)-O(1)      | 142.5(3)  | O(9)#6-Ni(2)-O(9)   | 174.8(6)   |
| O(7)#4-Tb(1)-O(1)    | 73.1(3)   | O(10)-Ni(2)-N(1)    | 89.6(3)    |
| O(4)#5-Tb(1)-O(1)    | 81.8(3)   | O(9)#6-Ni(2)-N(1)   | 93.3(4)    |
| O(3)#3-Tb(1)-O(12)   | 147.5(3)  | O(9)-Ni(2)-N(1)     | 86.7(4)    |
| O(13)-Tb(1)-O(12)    | 73.6(3)   | O(10)-Ni(2)-N(1)#6  | 89.6(3)    |
| O(5)-Tb(1)-O(12)     | 74.6(3)   | O(9)#6-Ni(2)-N(1)#6 | 86.7(4)    |
| O(7)#4-Tb(1)-O(12)   | 131.9(3)  | O(9)-Ni(2)-N(1)#6   | 93.3(4)    |
| O(4)#5-Tb(1)-O(12)   | 71.5(3)   | N(1)-Ni(2)-N(1)#6   | 179.1(6)   |
| O(1)-Tb(1)-O(12)     | 68.8(3)   | O(10)-Ni(2)-O(11)   | 180.000(1) |
| O(3)#3-Tb(1)-O(2)    | 86.9(3)   | O(9)#6-Ni(2)-O(11)  | 92.6(3)    |
| O(13)-Tb(1)-O(2)     | 74.0(3)   | O(9)-Ni(2)-O(11)    | 92.6(3)    |
| O(5)-Tb(1)-O(2)      | 152.7(3)  | N(1)-Ni(2)-O(11)    | 90.4(3)    |
| O(7)#4-Tb(1)-O(2)    | 70.5(3)   | N(1)#6-Ni(2)-O(11)  | 90.4(3)    |
| 6                    |           |                     |            |
| O(7)-Dy(1)#1         | 2.336(8)  | Dy(1)-O(7)#1        | 2.336(8)   |
| O(13')-Dy(1)         | 2.33(2)   | Dy(1)-O(3)          | 2.365(9)   |
| O(13)-Dy(1)          | 2.42(2)   | Dy(1)-O(2)#3        | 2.428(8)   |
| O(12)-Dy(1)          | 2.426(9)  | Dy(1)-O(1)#3        | 2.578(9)   |
| O(11)-Ni(2)          | 2.067(16) | N(1)-Ni(2)          | 2.082(9)   |

|                     |           |                      |            |
|---------------------|-----------|----------------------|------------|
| O(9)-Ni(2)          | 2.073(17) | Ni(2)-O(10)#4        | 2.042(8)   |
| O(5)-Dy(1)          | 2.335(9)  | Ni(2)-O(10)          | 2.042(8)   |
| O(4)-Dy(1)#1        | 2.283(9)  | Ni(2)-N(1)#4         | 2.082(9)   |
| O(4)-Dy(1)          | 2.844(10) | O(1)-Dy(1)#2         | 2.578(9)   |
| Dy(1)-O(4)#1        | 2.283(9)  | O(2)-Dy(1)#2         | 2.428(8)   |
| Dy(1)#1-O(4)-Dy(1)  | 104.6(3)  | O(5)-Dy(1)-O(1)#3    | 71.1(3)    |
| O(4)#1-Dy(1)-O(13') | 72.1(7)   | O(7)#1-Dy(1)-O(1)#3  | 149.3(4)   |
| O(4)#1-Dy(1)-O(5)   | 78.1(4)   | O(3)-Dy(1)-O(1)#3    | 127.4(3)   |
| O(13')-Dy(1)-O(5)   | 137.5(6)  | O(13)-Dy(1)-O(1)#3   | 67.2(5)    |
| O(4)#1-Dy(1)-O(7)#1 | 80.6(3)   | O(12)-Dy(1)-O(1)#3   | 100.4(3)   |
| O(13')-Dy(1)-O(7)#1 | 70.9(6)   | O(2)#3-Dy(1)-O(1)#3  | 51.2(3)    |
| O(5)-Dy(1)-O(7)#1   | 133.1(3)  | O(4)#1-Dy(1)-O(4)    | 75.4(3)    |
| O(4)#1-Dy(1)-O(3)   | 124.2(3)  | O(13')-Dy(1)-O(4)    | 128.8(7)   |
| O(13')-Dy(1)-O(3)   | 145.4(6)  | O(5)-Dy(1)-O(4)      | 68.8(3)    |
| O(5)-Dy(1)-O(3)     | 76.9(4)   | O(7)#1-Dy(1)-O(4)    | 65.5(3)    |
| O(7)#1-Dy(1)-O(3)   | 81.5(3)   | O(3)-Dy(1)-O(4)      | 49.2(3)    |
| O(4)#1-Dy(1)-O(13)  | 85.5(6)   | O(13)-Dy(1)-O(4)     | 145.4(4)   |
| O(13')-Dy(1)-O(13)  | 17.2(7)   | O(12)-Dy(1)-O(4)     | 114.0(3)   |
| O(5)-Dy(1)-O(13)    | 135.3(6)  | O(2)#3-Dy(1)-O(4)    | 121.4(3)   |
| O(7)#1-Dy(1)-O(13)  | 83.3(5)   | O(1)#3-Dy(1)-O(4)    | 139.1(3)   |
| O(3)-Dy(1)-O(13)    | 143.3(6)  | O(10)#4-Ni(2)-O(10)  | 173.9(6)   |
| O(4)#1-Dy(1)-O(12)  | 145.8(3)  | O(10)#4-Ni(2)-O(11)  | 87.0(3)    |
| O(13')-Dy(1)-O(12)  | 77.6(7)   | O(10)-Ni(2)-O(11)    | 87.0(3)    |
| O(5)-Dy(1)-O(12)    | 136.0(3)  | O(10)#4-Ni(2)-O(9)   | 93.0(3)    |
| O(7)#1-Dy(1)-O(12)  | 74.8(3)   | O(10)-Ni(2)-O(9)     | 93.0(3)    |
| O(3)-Dy(1)-O(12)    | 75.3(4)   | O(11)-Ni(2)-O(9)     | 180.000(9) |
| O(13)-Dy(1)-O(12)   | 68.5(6)   | O(10)#4-Ni(2)-N(1)   | 87.0(3)    |
| O(4)#1-Dy(1)-O(2)#3 | 136.4(3)  | O(10)-Ni(2)-N(1)     | 92.9(3)    |
| O(13')-Dy(1)-O(2)#3 | 109.4(7)  | O(11)-Ni(2)-N(1)     | 89.6(3)    |
| O(5)-Dy(1)-O(2)#3   | 73.2(3)   | O(9)-Ni(2)-N(1)      | 90.4(3)    |
| O(7)#1-Dy(1)-O(2)#3 | 142.5(3)  | O(10)#4-Ni(2)-N(1)#4 | 92.9(3)    |
| O(3)-Dy(1)-O(2)#3   | 80.2(3)   | O(10)-Ni(2)-N(1)#4   | 87.0(3)    |
| O(13)-Dy(1)-O(2)#3  | 92.3(5)   | O(11)-Ni(2)-N(1)#4   | 89.6(3)    |
| O(12)-Dy(1)-O(2)#3  | 68.9(3)   | O(9)-Ni(2)-N(1)#4    | 90.4(3)    |
| O(4)#1-Dy(1)-O(1)#3 | 88.7(3)   | N(1)-Ni(2)-N(1)#4    | 179.2(6)   |
| O(13')-Dy(1)-O(1)#3 | 78.4(6)   |                      |            |
| 7                   |           |                      |            |
| Ho(1)-O(4)#1        | 2.263(4)  | Ni(1)-O(13)          | 2.044(8)   |
| Ho(1)-O(5)          | 2.319(5)  | Ni(1)-O(12)          | 2.048(6)   |
| Ho(1)-O(6)#2        | 2.328(5)  | Ni(1)-O(12)#4        | 2.048(6)   |
| Ho(1)-O(3)#3        | 2.350(5)  | Ni(1)-N(2)           | 2.066(6)   |
| Ho(1)-O(9)          | 2.368(6)  | Ni(1)-N(2)#4         | 2.066(6)   |
| Ho(1)-O(10)         | 2.428(5)  | Ni(1)-O(11)          | 2.088(8)   |

|                     |            |                      |            |
|---------------------|------------|----------------------|------------|
| Ho(1)-O(1)          | 2.431(5)   | O(3)-Ho(1)#5         | 2.350(5)   |
| Ho(1)-O(2)          | 2.537(6)   | O(4)-Ho(1)#6         | 2.263(4)   |
| Ho(1)-O(4)#3        | 2.854(5)   | O(4)-Ho(1)#5         | 2.854(5)   |
| O(4)#1-Ho(1)-O(5)   | 78.29(18)  | O(10)-Ho(1)-O(2)     | 99.6(2)    |
| O(4)#1-Ho(1)-O(6)#2 | 80.90(17)  | O(1)-Ho(1)-O(2)      | 51.96(17)  |
| O(5)-Ho(1)-O(6)#2   | 133.08(18) | O(4)#1-Ho(1)-O(4)#3  | 75.35(17)  |
| O(4)#1-Ho(1)-O(3)#3 | 123.98(18) | O(5)-Ho(1)-O(4)#3    | 68.71(17)  |
| O(5)-Ho(1)-O(3)#3   | 77.1(2)    | O(6)#2-Ho(1)-O(4)#3  | 65.50(16)  |
| O(6)#2-Ho(1)-O(3)#3 | 80.72(18)  | O(3)#3-Ho(1)-O(4)#3  | 48.89(15)  |
| O(4)#1-Ho(1)-O(9)   | 78.7(2)    | O(9)-Ho(1)-O(4)#3    | 136.9(2)   |
| O(5)-Ho(1)-O(9)     | 137.5(2)   | O(10)-Ho(1)-O(4)#3   | 114.73(17) |
| O(6)#2-Ho(1)-O(9)   | 76.9(2)    | O(1)-Ho(1)-O(4)#3    | 120.74(16) |
| O(3)#3-Ho(1)-O(9)   | 144.8(2)   | O(2)-Ho(1)-O(4)#3    | 139.18(18) |
| O(4)#1-Ho(1)-O(10)  | 145.38(18) | O(13)-Ni(1)-O(12)    | 87.43(16)  |
| O(5)-Ho(1)-O(10)    | 136.26(18) | O(13)-Ni(1)-O(12)#4  | 87.43(16)  |
| O(6)#2-Ho(1)-O(10)  | 74.78(18)  | O(12)-Ni(1)-O(12)#4  | 174.9(3)   |
| O(3)#3-Ho(1)-O(10)  | 76.11(19)  | O(13)-Ni(1)-N(2)     | 89.63(18)  |
| O(9)-Ho(1)-O(10)    | 72.1(2)    | O(12)-Ni(1)-N(2)     | 92.3(2)    |
| O(4)#1-Ho(1)-O(1)   | 137.19(18) | O(12)#4-Ni(1)-N(2)   | 87.6(2)    |
| O(5)-Ho(1)-O(1)     | 73.23(17)  | O(13)-Ni(1)-N(2)#4   | 89.63(18)  |
| O(6)#2-Ho(1)-O(1)   | 141.50(18) | O(12)-Ni(1)-N(2)#4   | 87.6(2)    |
| O(3)#3-Ho(1)-O(1)   | 79.76(18)  | O(12)#4-Ni(1)-N(2)#4 | 92.3(2)    |
| O(9)-Ho(1)-O(1)     | 101.7(2)   | N(2)-Ni(1)-N(2)#4    | 179.3(4)   |
| O(10)-Ho(1)-O(1)    | 68.47(19)  | O(13)-Ni(1)-O(11)    | 180.000(3) |
| O(4)#1-Ho(1)-O(2)   | 89.00(18)  | O(12)-Ni(1)-O(11)    | 92.57(16)  |
| O(5)-Ho(1)-O(2)     | 71.3(2)    | O(12)#4-Ni(1)-O(11)  | 92.57(16)  |
| O(6)#2-Ho(1)-O(2)   | 149.58(19) | N(2)-Ni(1)-O(11)     | 90.37(18)  |
| O(3)#3-Ho(1)-O(2)   | 127.72(18) | N(2)#4-Ni(1)-O(11)   | 90.37(19)  |
| O(9)-Ho(1)-O(2)     | 73.0(2)    |                      |            |
| 8                   |            |                      |            |
| Er(1)-O(15)         | 2.290(3)   | Er(2)-O(11)          | 2.346(3)   |
| Er(1)-O(10)         | 2.294(3)   | Er(2)-O(12)#1        | 2.370(3)   |
| Er(1)-O(2)          | 2.311(3)   | Er(2)-O(9)           | 2.426(3)   |
| Er(1)-O(19)         | 2.338(3)   | Er(2)-O(10)          | 2.687(3)   |
| Er(1)-O(6)          | 2.357(3)   | Er(2)-O(13)#1        | 2.793(3)   |
| Er(1)-O(7)          | 2.367(3)   | Ni(1)-O(25)          | 2.012(3)   |
| Er(1)-O(4)          | 2.394(3)   | Ni(1)-O(24)          | 2.071(4)   |
| Er(1)-O(5)          | 2.454(3)   | Ni(1)-N(4)#2         | 2.072(4)   |
| Er(2)-O(3)          | 2.232(3)   | Ni(1)-N(1)           | 2.077(4)   |
| Er(2)-O(14)         | 2.303(3)   | Ni(1)-O(23)          | 2.086(3)   |
| Er(2)-O(18)         | 2.345(3)   | Ni(1)-O(22)          | 2.097(4)   |
| Er(2)-O(8)          | 2.345(3)   |                      |            |
| O(15)-Er(1)-O(10)   | 72.48(12)  | O(8)-Er(2)-O(12)#1   | 87.36(12)  |

|                     |            |                       |            |
|---------------------|------------|-----------------------|------------|
| O(15)-Er(1)-O(2)    | 79.60(12)  | O(11)-Er(2)-O(12)#1   | 85.44(12)  |
| O(10)-Er(1)-O(2)    | 116.88(12) | O(3)-Er(2)-O(9)       | 144.51(12) |
| O(15)-Er(1)-O(19)   | 130.77(12) | O(14)-Er(2)-O(9)      | 74.46(12)  |
| O(10)-Er(1)-O(19)   | 80.04(12)  | O(18)-Er(2)-O(9)      | 132.17(12) |
| O(2)-Er(1)-O(19)    | 77.57(12)  | O(8)-Er(2)-O(9)       | 72.09(12)  |
| O(15)-Er(1)-O(6)    | 140.77(12) | O(11)-Er(2)-O(9)      | 70.76(12)  |
| O(10)-Er(1)-O(6)    | 146.34(11) | O(12)#1-Er(2)-O(9)    | 70.09(11)  |
| O(2)-Er(1)-O(6)     | 82.30(12)  | O(3)-Er(2)-O(10)      | 79.80(12)  |
| O(19)-Er(1)-O(6)    | 77.56(12)  | O(14)-Er(2)-O(10)     | 69.21(10)  |
| O(15)-Er(1)-O(7)    | 133.63(13) | O(18)-Er(2)-O(10)     | 67.71(11)  |
| O(10)-Er(1)-O(7)    | 75.69(12)  | O(8)-Er(2)-O(10)      | 145.42(11) |
| O(2)-Er(1)-O(7)     | 145.95(12) | O(11)-Er(2)-O(10)     | 51.20(11)  |
| O(19)-Er(1)-O(7)    | 73.68(12)  | O(12)#1-Er(2)-O(10)   | 126.94(11) |
| O(6)-Er(1)-O(7)     | 74.09(13)  | O(9)-Er(2)-O(10)      | 112.21(11) |
| O(15)-Er(1)-O(4)    | 74.77(12)  | O(3)-Er(2)-O(13)#1    | 81.37(11)  |
| O(10)-Er(1)-O(4)    | 97.11(12)  | O(14)-Er(2)-O(13)#1   | 146.51(11) |
| O(2)-Er(1)-O(4)     | 128.24(12) | O(18)-Er(2)-O(13)#1   | 68.10(11)  |
| O(19)-Er(1)-O(4)    | 150.04(11) | O(8)-Er(2)-O(13)#1    | 69.74(11)  |
| O(6)-Er(1)-O(4)     | 90.10(12)  | O(11)-Er(2)-O(13)#1   | 127.97(11) |
| O(7)-Er(1)-O(4)     | 76.72(12)  | O(12)#1-Er(2)-O(13)#1 | 49.56(11)  |
| O(15)-Er(1)-O(5)    | 72.64(12)  | O(9)-Er(2)-O(13)#1    | 107.76(11) |
| O(10)-Er(1)-O(5)    | 139.32(11) | O(10)-Er(2)-O(13)#1   | 133.49(10) |
| O(2)-Er(1)-O(5)     | 76.15(12)  | O(25)-Ni(1)-O(24)     | 85.69(13)  |
| O(19)-Er(1)-O(5)    | 139.89(11) | O(25)-Ni(1)-N(4)#2    | 92.78(14)  |
| O(6)-Er(1)-O(5)     | 69.35(11)  | O(24)-Ni(1)-N(4)#2    | 92.46(15)  |
| O(7)-Er(1)-O(5)     | 116.20(12) | O(25)-Ni(1)-N(1)      | 86.75(15)  |
| O(4)-Er(1)-O(5)     | 53.59(11)  | O(24)-Ni(1)-N(1)      | 87.03(15)  |
| O(3)-Er(2)-O(14)    | 79.72(12)  | N(4)#2-Ni(1)-N(1)     | 179.33(17) |
| O(3)-Er(2)-O(18)    | 83.27(12)  | O(25)-Ni(1)-O(23)     | 173.39(15) |
| O(14)-Er(2)-O(18)   | 135.75(11) | O(24)-Ni(1)-O(23)     | 87.70(13)  |
| O(3)-Er(2)-O(8)     | 79.80(12)  | N(4)#2-Ni(1)-O(23)    | 87.16(14)  |
| O(14)-Er(2)-O(8)    | 79.86(12)  | N(1)-Ni(1)-O(23)      | 93.26(14)  |
| O(18)-Er(2)-O(8)    | 136.35(11) | O(25)-Ni(1)-O(22)     | 95.86(13)  |
| O(3)-Er(2)-O(11)    | 130.90(12) | O(24)-Ni(1)-O(22)     | 176.84(13) |
| O(14)-Er(2)-O(11)   | 84.94(12)  | N(4)#2-Ni(1)-O(22)    | 90.22(15)  |
| O(18)-Er(2)-O(11)   | 76.08(12)  | N(1)-Ni(1)-O(22)      | 90.30(15)  |
| O(8)-Er(2)-O(11)    | 142.41(12) | O(23)-Ni(1)-O(22)     | 90.76(13)  |
| O(3)-Er(2)-O(12)#1  | 130.54(12) | Er(1)-O(10)-Er(2)     | 109.46(12) |
| O(14)-Er(2)-O(12)#1 | 144.49(12) | O(18)-Er(2)-O(12)#1   | 73.87(12)  |
| 9                   |            |                       |            |
| Yb(1)-O(13)         | 2.272(3)   | Yb(2)-O(24)           | 2.324(3)   |
| Yb(1)-O(5)          | 2.281(3)   | Yb(2)-O(7)#1          | 2.348(3)   |
| Yb(1)-O(3)          | 2.283(3)   | Yb(2)-O(25)           | 2.400(3)   |

|                   |            |                     |            |
|-------------------|------------|---------------------|------------|
| Yb(1)-O(14)       | 2.320(3)   | Yb(2)-O(5)          | 2.682(3)   |
| Yb(1)-O(22)       | 2.329(3)   | Yb(2)-O(8)#1        | 2.913(3)   |
| Yb(1)-O(23)       | 2.348(3)   | Yb(2)-C(18)#1       | 3.008(4)   |
| Yb(1)-O(1)        | 2.363(3)   | Ni(3)-O(20)         | 2.018(3)   |
| Yb(1)-O(2)        | 2.439(3)   | Ni(3)-N(3)#2        | 2.065(3)   |
| Yb(2)-O(4)        | 2.207(3)   | Ni(3)-O(19)         | 2.072(4)   |
| Yb(2)-O(12)       | 2.274(3)   | Ni(3)-N(1)          | 2.073(3)   |
| Yb(2)-O(6)        | 2.318(3)   | Ni(3)-O(21)         | 2.094(4)   |
| Yb(2)-O(15)       | 2.321(3)   | Ni(3)-O(18)         | 2.114(3)   |
| O(13)-Yb(1)-O(5)  | 72.17(10)  | O(6)-Yb(2)-O(7)#1   | 87.89(10)  |
| O(13)-Yb(1)-O(3)  | 79.37(11)  | O(15)-Yb(2)-O(7)#1  | 72.88(10)  |
| O(5)-Yb(1)-O(3)   | 114.26(10) | O(24)-Yb(2)-O(7)#1  | 84.85(10)  |
| O(13)-Yb(1)-O(14) | 130.07(11) | O(4)-Yb(2)-O(25)    | 145.19(11) |
| O(5)-Yb(1)-O(14)  | 79.32(10)  | O(12)-Yb(2)-O(25)   | 76.39(10)  |
| O(3)-Yb(1)-O(14)  | 76.19(11)  | O(6)-Yb(2)-O(25)    | 70.25(11)  |
| O(13)-Yb(1)-O(22) | 141.34(10) | O(15)-Yb(2)-O(25)   | 131.16(10) |
| O(5)-Yb(1)-O(22)  | 146.16(10) | O(24)-Yb(2)-O(25)   | 71.91(11)  |
| O(3)-Yb(1)-O(22)  | 83.93(11)  | O(7)#1-Yb(2)-O(25)  | 71.15(10)  |
| O(14)-Yb(1)-O(22) | 77.84(10)  | O(4)-Yb(2)-O(5)     | 81.23(10)  |
| O(13)-Yb(1)-O(23) | 133.21(11) | O(12)-Yb(2)-O(5)    | 69.39(10)  |
| O(5)-Yb(1)-O(23)  | 75.38(10)  | O(6)-Yb(2)-O(5)     | 51.33(9)   |
| O(3)-Yb(1)-O(23)  | 145.84(11) | O(15)-Yb(2)-O(5)    | 67.44(10)  |
| O(14)-Yb(1)-O(23) | 73.64(10)  | O(24)-Yb(2)-O(5)    | 147.24(10) |
| O(22)-Yb(1)-O(23) | 74.43(11)  | O(7)#1-Yb(2)-O(5)   | 127.82(10) |
| O(13)-Yb(1)-O(1)  | 75.64(11)  | O(25)-Yb(2)-O(5)    | 112.85(10) |
| O(5)-Yb(1)-O(1)   | 98.78(10)  | O(4)-Yb(2)-O(8)#1   | 78.59(9)   |
| O(3)-Yb(1)-O(1)   | 129.46(10) | O(12)-Yb(2)-O(8)#1  | 145.58(10) |
| O(14)-Yb(1)-O(1)  | 150.16(10) | O(6)-Yb(2)-O(8)#1   | 129.01(9)  |
| O(22)-Yb(1)-O(1)  | 89.06(10)  | O(15)-Yb(2)-O(8)#1  | 67.57(10)  |
| O(23)-Yb(1)-O(1)  | 77.06(10)  | O(24)-Yb(2)-O(8)#1  | 68.85(10)  |
| O(13)-Yb(1)-O(2)  | 72.47(10)  | O(7)#1-Yb(2)-O(8)#1 | 48.15(9)   |
| O(5)-Yb(1)-O(2)   | 139.90(10) | O(25)-Yb(2)-O(8)#1  | 108.30(9)  |
| O(3)-Yb(1)-O(2)   | 76.70(10)  | O(5)-Yb(2)-O(8)#1   | 132.25(9)  |
| O(14)-Yb(1)-O(2)  | 139.48(9)  | O(20)-Ni(3)-N(3)#2  | 92.85(12)  |
| O(22)-Yb(1)-O(2)  | 69.84(10)  | O(20)-Ni(3)-O(19)   | 85.62(12)  |
| O(23)-Yb(1)-O(2)  | 118.18(10) | N(3)#2-Ni(3)-O(19)  | 92.69(13)  |
| O(1)-Yb(1)-O(2)   | 54.14(9)   | O(20)-Ni(3)-N(1)    | 87.14(12)  |
| O(4)-Yb(2)-O(12)  | 79.80(10)  | N(3)#2-Ni(3)-N(1)   | 179.82(19) |
| O(4)-Yb(2)-O(6)   | 132.48(11) | O(19)-Ni(3)-N(1)    | 87.48(13)  |
| O(12)-Yb(2)-O(6)  | 85.14(11)  | O(20)-Ni(3)-O(21)   | 95.76(12)  |
| O(4)-Yb(2)-O(15)  | 83.42(11)  | N(3)#2-Ni(3)-O(21)  | 90.22(13)  |
| O(12)-Yb(2)-O(15) | 135.47(10) | O(19)-Ni(3)-O(21)   | 176.71(10) |
| O(6)-Yb(2)-O(15)  | 76.53(11)  | N(1)-Ni(3)-O(21)    | 89.61(13)  |

|                    |            |                    |            |
|--------------------|------------|--------------------|------------|
| O(4)-Yb(2)-O(24)   | 79.69(11)  | O(20)-Ni(3)-O(18)  | 173.18(15) |
| O(12)-Yb(2)-O(24)  | 81.16(11)  | N(3)#2-Ni(3)-O(18) | 86.80(12)  |
| O(6)-Yb(2)-O(24)   | 141.80(10) | O(19)-Ni(3)-O(18)  | 87.59(12)  |
| O(15)-Yb(2)-O(24)  | 135.50(11) | N(1)-Ni(3)-O(18)   | 93.23(12)  |
| O(4)-Yb(2)-O(7)#1  | 126.48(10) | O(21)-Ni(3)-O(18)  | 91.05(12)  |
| O(12)-Yb(2)-O(7)#1 | 147.26(10) |                    |            |
